# Supplementary material for: Excitatory and inhibitory D-serine binding to the NMDA receptor
Source: eLife. 2022 Oct 27;11:e77645. doi: 10.7554/eLife.77645 (PMC9612912; doi:10.7554/eLife.77645)
Supplement: Figure 1—source data 1. [file elife-77645-fig1-data1.xlsx]

## Sheet: 1_Simulation_Summary
Dataset	time (ns)	# atoms	timestep (fs)	ligands	glycans?
10 D-Ser 10 Glu noglyc	15038.4	164643	2.5	10 D-Ser, 10 Glu	No
10 D-Ser 10 Glu glyc	15028.8	164302	2	10 D-Ser, 10 Glu	Yes
20 D-Ser noglyc	15014.2	164555	2.5	20 D-Ser	No
20 D-Ser glyc	10568.2	164436	2.5	20 D-Ser	Yes
20 D-Ser glyc 2020	15021.8	164211	2	20 D-Ser	Yes
20 D-Ser glyc 2021	10006.6	164436	2	20 D-Ser	Yes
