# Supplementary material for: Excitatory and inhibitory D-serine binding to the NMDA receptor
Source: eLife. 2022 Oct 27;11:e77645. doi: 10.7554/eLife.77645 (PMC9612912; doi:10.7554/eLife.77645)
Supplement: Figure 1—source data 2. [file elife-77645-fig1-data2.xlsx]

## Sheet: 2_GluN2A
Path ID	Event Type	Ligand ID	Start frame	End Frame	Event duration (ns)	Time bound (ns)	Time apo after (ns)	Median (xi1, xi2)	Dataset	Summary Data
100	LA4	B	22061	22070	2.16	1.92		14.5 13.7	10 D-Ser 10 Glu noglyc	62660	frames
101	LA4	U	22077	22078	0.24		11.28	13.9 13.1	10 D-Ser 10 Glu noglyc	15.0384	microseconds
102	LA7	B	22126	22146	4.8	1.92		14.3 14.2	10 D-Ser 10 Glu noglyc
103	LA7	U	22153	22155	0.48		175.68	13.9 13.7	10 D-Ser 10 Glu noglyc
104	LA2	B	22888	22895	1.68	0.24		15.5 14.0	10 D-Ser 10 Glu noglyc
105	LA2	U	22895	22896	0.24		5495.76	14.5 14.6	10 D-Ser 10 Glu noglyc
106	LA2	B	45796	45802	1.44	6.24		17.1 15.1	10 D-Ser 10 Glu noglyc
107	LA2	U	45827	45831	0.96		75.84	17.4 15.2	10 D-Ser 10 Glu noglyc
108	LA2	B	46148	46150	0.48	4.8		17.1 15.5	10 D-Ser 10 Glu noglyc
109	LA2	U	46169	46176	1.68		1445.76	16.8 14.5	10 D-Ser 10 Glu noglyc
110	LA4	B	52201	52205	0.96	322.08		30.5 14.7	10 D-Ser 10 Glu noglyc
111	LA4	U	53546	53589	10.32		2177.04	24.4 14.6	10 D-Ser 10 Glu noglyc
200	LA4	B	30674	30675	0.24	0.24		19.3 16.1	10 D-Ser 10 Glu glyc	62620	frames
201	LA4	U	30675	30684	2.16		797.28	19.0 16.5	10 D-Ser 10 Glu glyc	15.0288	microseconds
202	LA7	B	34007	34033	6.24	3.36		17.8 14.3	10 D-Ser 10 Glu glyc
203	LA7	U	34046	34064	4.32		294	17.9 14.6	10 D-Ser 10 Glu glyc
204	LA7	B	35290	35294	0.96	1.92		19.0 14.7	10 D-Ser 10 Glu glyc
205	LA7	U	35301	35304	0.72		408.96	16.5 13.8	10 D-Ser 10 Glu glyc
206	LA9	B	37009	37012	0.72	0.48		21.8 15.4	10 D-Ser 10 Glu glyc
207	LA9	U	37013	37016	0.72		2755.2	20.1 15.6	10 D-Ser 10 Glu glyc
208	LA5	B	48497	48505	1.92	10.08		18.7 13.9	10 D-Ser 10 Glu glyc
209	LA5	U	48546	48554	1.92		3375.84	20.4 13.7	10 D-Ser 10 Glu glyc
300	LA2	B	2321	2441	28.8	1061.04		12.8 14.5	20 D-Ser noglyc	62559	frames
301	LA2	U	6861	6881	4.8		10393.2	14.2 14.0	20 D-Ser noglyc	15.0142	microseconds
302	LA3	B	50187	50189	0.48	0.48		19.0 12.2	20 D-Ser noglyc
303	LA3	U	50190	50191	0.24		62.4	18.1 12.5	20 D-Ser noglyc
304	LA1	B	50452	50471	4.56	0.48		11.3 12.0	20 D-Ser noglyc
305	LA1	U	50472	50501	6.96		89.52	11.0 12.0	20 D-Ser noglyc
306	LA15	B	50875	50885	2.4	3.6		20.1 12.9	20 D-Ser noglyc
307	LA15	U	50899	50899	0		291.6	22.7 14.0	20 D-Ser noglyc
308	LA4	B	52115	52152	8.88	2.4		24.2 13.3	20 D-Ser noglyc
309	LA4	U	52161	52164	0.72		50.88	26.5 13.6	20 D-Ser noglyc
310	LA2	B	52377	52406	6.96	3.12		16.8 13.4	20 D-Ser noglyc
311	LA2	U	52418	52418	0		774.72	17.5 12.2	20 D-Ser noglyc
312	LA15	B	55647	55647	0	3.84		24.7 12.3	20 D-Ser noglyc
313	LA15	U	55662	55664	0.48		453.36	20.1 12.4	20 D-Ser noglyc
314	LA3	B	57554	57584	7.2	208.56		20.7 12.5	20 D-Ser noglyc
315	LA3	U	58452	58460	1.92		221.28	17.1 13.9	20 D-Ser noglyc
316	LA12	B	59383	59394	2.64	2.4		16.4 12.8	20 D-Ser noglyc
317	LA12	U	59403	59437	8.16		101.04	15.8 12.8	20 D-Ser noglyc
318	LA12	B	59859	59859	0	2.4		15.4 12.7	20 D-Ser noglyc
319	LA12	U	59868	59869	0.24		323.28	14.7 12.2	20 D-Ser noglyc
320	LA18	B	61217	61219	0.48	2.16		16.8 14.5	20 D-Ser noglyc
321	LA18	U	61227	61233	1.44		110.88	16.3 12.3	20 D-Ser noglyc
322	LA16	B	61696	61696	0	16.56		15.0 12.5	20 D-Ser noglyc
323	LA16	U	61764	61773	2.16		188.64	15.0 12.7	20 D-Ser noglyc
400	LA13	B	6401	6411	2.4	1.2		13.9 15.1	20 D-Ser glyc	44034	frames
401	LA13	U	6415	6548	31.92		1026	13.6 14.7	20 D-Ser glyc	10.5682	microseconds
402	LA18	B	10824	10831	1.68	3.12		15.1 14.6	20 D-Ser glyc
403	LA18	U	10843	10856	3.12		522.96	13.2 13.4	20 D-Ser glyc
404	LA8	B	13036	13053	4.08	6		15.4 15.0	20 D-Ser glyc
405	LA8	U	13077	13152	18		88.32	15.3 15.2	20 D-Ser glyc
406	LA2	B	13521	13524	0.72	0.24		15.5 14.8	20 D-Ser glyc
407	LA2	U	13524	13557	7.92		190.08	15.8 15.0	20 D-Ser glyc
408	LA8	B	14350	14382	7.68	497.76		15.4 14.2	20 D-Ser glyc
409	LA8	U	16455	16456	0.24		187.92	16.1 13.1	20 D-Ser glyc
410	LA9	B	17240	17245	1.2	13.92		16.6 13.3	20 D-Ser glyc
411	LA9	U	17302	17316	3.36		350.88	16.1 13.3	20 D-Ser glyc
412	LA6	B	18779	18806	6.48	209.28		16.5 14.0	20 D-Ser glyc
413	LA6	U	19677	19685	1.92		1427.04	19.1 14.3	20 D-Ser glyc
414	LA15	B	25632	25636	0.96	329.52		17.9 15.4	20 D-Ser glyc
415	LA15	U	27008	27014	1.44		200.88	16.3 14.9	20 D-Ser glyc
416	LA14	B	27852	27891	9.36	67.68		17.0 14.4	20 D-Ser glyc
417	LA14	U	28172	28218	11.04		434.88	16.8 14.3	20 D-Ser glyc
418	LA2	B	30031	30045	3.36	2.64		18.3 14.8	20 D-Ser glyc
419	LA2	U	30055	30084	6.96		263.76	17.9 15.0	20 D-Ser glyc
420	LA17	B	31184	31199	3.6	3080.64		16.6 14.5	20 D-Ser glyc				Does not unbind at end of trajectory
600	LA2	B	9108	9111	0.72	2.64		27.1 12.0	20 D-Ser glyc 2020	62591	frames
601	LA2	U	9121	9123	0.48		327.84	25.3 12.8	20 D-Ser glyc 2020	15.0218	microseonds
602	LA4	B	10490	10497	1.68	4041.6		25.5 13.2	20 D-Ser glyc 2020
603	LA4	U	27336	27366	7.2		667.92	15.3 13.1	20 D-Ser glyc 2020
604	LA13	B	30150	30166	3.84	33.6		18.1 14.5	20 D-Ser glyc 2020
605	LA13	U	30305	30325	4.8		27.6	17.4 14.4	20 D-Ser glyc 2020
606	LA10	B	30441	30459	4.32	3.12		18.0 14.1	20 D-Ser glyc 2020
607	LA10	U	30471	30482	2.64		227.04	16.4 13.9	20 D-Ser glyc 2020
608	LA20	B	31429	31435	1.44	6.96		28.5 13.8	20 D-Ser glyc 2020
609	LA20	U	31463	31475	2.88		54.96	31.8 13.6	20 D-Ser glyc 2020
610	LA13	B	31705	31728	5.52	419.28		20.9 13.5	20 D-Ser glyc 2020
611	LA13	U	33474	33477	0.72		0	25.3 14.6	20 D-Ser glyc 2020
612	LA17	B	33478	33482	0.96	32.16		25.4 14.9	20 D-Ser glyc 2020
613	LA17	U	33615	33625	2.4		7.68	22.4 14.5	20 D-Ser glyc 2020
614	LA11	B	33658	33689	7.44	1018.8		30.2 14.1	20 D-Ser glyc 2020
615	LA11	U	37933	38058	30		278.4	24.1 14.3	20 D-Ser glyc 2020
616	LA17	B	39219	39221	0.48	71.76		32.4 16.0	20 D-Ser glyc 2020
617	LA17	U	39519	39626	25.68		0	19.0 14.3	20 D-Ser glyc 2020
618	LA13	B	39424	39599	42	6.48		17.4 14.4	20 D-Ser glyc 2020
619	LA13	U	39625	39626	0.24		45.12	24.0 13.6	20 D-Ser glyc 2020
620	LA5	B	39815	39816	0.24	2.4		19.7 13.8	20 D-Ser glyc 2020
621	LA5	U	39825	39828	0.72		22.32	18.5 14.6	20 D-Ser glyc 2020
622	LA7	B	39922	39923	0.24	2.64		18.8 14.3	20 D-Ser glyc 2020
623	LA7	U	39933	39934	0.24		403.44	21.5 15.3	20 D-Ser glyc 2020
624	LA18	B	41616	41620	0.96	5.04		29.5 13.9	20 D-Ser glyc 2020
625	LA18	U	41640	41641	0.24		105.12	29.4 13.9	20 D-Ser glyc 2020
626	LA4	B	42080	42118	9.12	0.24		25.3 14.0	20 D-Ser glyc 2020
627	LA4	U	42118	42122	0.96		612.24	25.9 13.6	20 D-Ser glyc 2020
628	LA12	B	44674	44675	0.24	0.96		28.7 14.4	20 D-Ser glyc 2020
629	LA12	U	44678	44680	0.48		3.84	27.8 14.2	20 D-Ser glyc 2020
630	LA10	B	44697	44702	1.2	0.72		28.5 14.7	20 D-Ser glyc 2020
631	LA10	U	44704	44715	2.64		7.2	27.8 14.8	20 D-Ser glyc 2020
632	LA2	B	44746	44762	3.84	0.24		26.1 14.4	20 D-Ser glyc 2020
633	LA2	U	44762	44767	1.2		1299.6	26.0 15.1	20 D-Ser glyc 2020
634	LA13	B	50183	50186	0.72	161.76		18.6 16.6	20 D-Ser glyc 2020
635	LA13	U	50859	50879	4.8		306.96	25.2 14.0	20 D-Ser glyc 2020
636	LA1	B	52159	52175	3.84	61.68		12.9 14.9	20 D-Ser glyc 2020
637	LA1	U	52431	52438	1.68		33.84	22.0 14.7	20 D-Ser glyc 2020
638	LA18	B	52580	52585	1.2	115.2		23.3 13.5	20 D-Ser glyc 2020
639	LA18	U	53064	53074	2.4		20.4	27.4 14.2	20 D-Ser glyc 2020
640	LA10	B	53160	53165	1.2	0.24		28.9 14.8	20 D-Ser glyc 2020
641	LA10	U	53165	53173	1.92		288.96	28.0 14.4	20 D-Ser glyc 2020
642	LA5	B	54378	54390	2.88	0.24		19.2 15.3	20 D-Ser glyc 2020
643	LA5	U	54390	54409	4.56		360.96	19.5 15.3	20 D-Ser glyc 2020
644	LA11	B	55914	55915	0.24	2.16		16.9 14.0	20 D-Ser glyc 2020
645	LA11	U	55923	55926	0.72		55.92	16.8 13.7	20 D-Ser glyc 2020
646	LA14	B	56160	56218	13.92	2.16		18.4 14.2	20 D-Ser glyc 2020
647	LA14	U	56226	56230	0.96		0	17.6 13.3	20 D-Ser glyc 2020
648	LA2	B	56175	56200	6	0.96		18.4 14.2	20 D-Ser glyc 2020
649	LA2	U	56203	56206	0.72		335.04	19.8 13.5	20 D-Ser glyc 2020
650	LA20	B	57603	57612	2.16	384		19.1 15.1	20 D-Ser glyc 2020
651	LA20	U	59211	59216	1.2		161.04	28.3 14.8	20 D-Ser glyc 2020
652	LA19	B	59888	59892	0.96	0.48		24.8 12.4	20 D-Ser glyc 2020
653	LA19	U	59893	59897	0.96		590.88	21.7 13.0	20 D-Ser glyc 2020
654	LA9	B	62360	62449	21.36	0.72		26.6 14.3	20 D-Ser glyc 2020
655	LA9	U	62451	62504	12.72		20.88	26.3 14.4	20 D-Ser glyc 2020
800	LA8	B	5509	5518	2.16	41.04		19.3 14.9	20 D-Ser glyc 2021	41694	frames
801	LA8	U	5688	5699	2.64		759.36	19.3 14.6	20 D-Ser glyc 2021	10.0066	microseconds
802	LA16	B	8864	9007	34.32	24.24		19.5 14.4	20 D-Ser glyc 2021
803	LA16	U	9107	9111	0.96		74.4	18.4 14.3	20 D-Ser glyc 2021
804	LA2	B	9422	9426	0.96	24.48		30.4 14.2	20 D-Ser glyc 2021
805	LA2	U	9527	9533	1.44		61.2	18.3 14.0	20 D-Ser glyc 2021
806	LA6	B	9789	9791	0.48	89.52		27.5 14.6	20 D-Ser glyc 2021
807	LA6	U	10163	10166	0.72		391.2	27.7 14.8	20 D-Ser glyc 2021
808	LA3	B	11797	11799	0.48	12.24		15.5 13.6	20 D-Ser glyc 2021
809	LA3	U	11849	11853	0.96		5953.92	14.1 13.6	20 D-Ser glyc 2021
810	LA12	B	36662	36671	2.16	0.24		12.2 11.7	20 D-Ser glyc 2021
811	LA12	U	36671	36672	0.24		1205.28	12.9 11.7	20 D-Ser glyc 2021
		System 1	System 2	System 3	System 4	TOTAL	VOL
	Total Time	15028.8	10568.2	15021.8	10006.6	50625.4	1.694e-21
	Time not free	36	4339.44	6633.12	239.28
	Time free	14992.8	6228.72	8388.72	9767.28
	denominator	1.46967e-07	1.22114e-07	1.64461e-07	1.91488e-07
all	numerator (Nb)	5	10	28	6
>100 ns	numerator (Nb)	0	4	6	0		,
	k_on	7.83963e+07	all
		1.59992e+07	>100 ns
	Kd	1.31703e+08	453922	399939	1.29087e+07
	dG_bind	-11.5098	-8.01899	-7.94104	-10.0799
