# Supplementary material for: Excitatory and inhibitory D-serine binding to the NMDA receptor
Source: eLife. 2022 Oct 27;11:e77645. doi: 10.7554/eLife.77645 (PMC9612912; doi:10.7554/eLife.77645)
Supplement: Figure 1—source data 3. [file elife-77645-fig1-data3.xlsx]

## Sheet: 5_contact_freq_N2_glyc
GluN2A D-serine glyc
Total					Cluster 1					Cluster 2					Cluster 3					Cluster 4
resid (model)	resid (Uniprot)	count	frequency		resid (model)	resid (Uniprot)	count	frequency		resid (model)	resid (Uniprot)	count	frequency		resid (model)	resid (Uniprot)	count	frequency		resid (model)	resid (Uniprot)	count	frequency
119	518	810	1		14	413	433	1		119	518	359	1		118	517	228	1		174	692	270	1
118	517	711	0.877778		212	730	363	0.838337		118	517	330	0.91922		119	518	168	0.736842		173	691	216	0.8
174	692	525	0.648148		112	511	303	0.699769		116	515	280	0.779944		116	515	146	0.640351		169	687	189	0.7
116	515	508	0.62716		213	731	272	0.628176		95	494	256	0.713092		174	692	134	0.587719		177	695	169	0.625926
14	413	443	0.546914		86	485	232	0.535797		94	493	166	0.462396		117	516	106	0.464912		118	517	141	0.522222
212	730	364	0.449383		171	689	220	0.508083		89	488	95	0.264624		114	513	74	0.324561		119	518	66	0.244444
86	485	354	0.437037		119	518	217	0.501155		86	485	93	0.259053		89	488	69	0.302632		116	515	59	0.218519
169	687	339	0.418519		114	513	174	0.401848		91	490	80	0.222841		177	695	45	0.197368		88	487	58	0.214815
114	513	316	0.390123		243	761	144	0.332564		92	491	69	0.192201		121	520	44	0.192982		114	513	53	0.196296
112	511	315	0.388889		85	484	138	0.318707		174	692	64	0.178273		173	691	42	0.184211		178	696	44	0.162963
95	494	306	0.377778		169	687	82	0.189376		177	695	33	0.091922		88	487	41	0.179825		171	689	41	0.151852
171	689	305	0.376543		13	412	77	0.177829		173	691	32	0.0891365		169	687	38	0.166667		184	702	32	0.118519
173	691	291	0.359259		196	714	62	0.143187		169	687	30	0.0835655		92	491	33	0.144737		86	485	23	0.0851852
213	731	274	0.338272		172	690	61	0.140878		88	487	24	0.0668524		171	689	23	0.100877		85	484	20	0.0740741
177	695	249	0.307407		174	692	57	0.13164		83	482	22	0.0612813		95	494	22	0.0964912		95	494	15	0.0555556
94	493	186	0.22963		88	487	53	0.122402		171	689	21	0.0584958		94	493	15	0.0657895		175	693	15	0.0555556
89	488	178	0.219753		220	738	52	0.120092		114	513	15	0.0417827		91	490	10	0.0438596		192	710	14	0.0518519
88	487	176	0.217284		83	482	44	0.101617		85	484	11	0.0306407		178	696	8	0.0350877		89	488	12	0.0444444
85	484	171	0.211111		39	438	34	0.0785219		49	448	8	0.0222841		86	485	6	0.0263158		92	491	10	0.037037
243	761	147	0.181481		116	515	23	0.0531178		103	502	6	0.0167131		112	511	5	0.0219298		185	703	9	0.0333333
117	516	118	0.145679		132	531	23	0.0531178		14	413	5	0.0139276		182	700	3	0.0131579		94	493	5	0.0185185
92	491	113	0.139506		95	494	13	0.0300231		105	504	5	0.0139276		184	702	3	0.0131579		14	413	4	0.0148148
91	490	92	0.11358		97	496	13	0.0300231		117	516	4	0.0111421		85	484	2	0.00877193		112	511	4	0.0148148
13	412	77	0.0950617		118	517	12	0.0277136		42	441	3	0.00835655		175	693	2	0.00877193		179	697	4	0.0148148
83	482	69	0.0851852		175	693	11	0.0254042		82	481	3	0.00835655		188	706	2	0.00877193		83	482	3	0.0111111
172	690	62	0.0765432		191	709	10	0.0230947		112	511	3	0.00835655		241	759	2	0.00877193		188	706	3	0.0111111
196	714	62	0.0765432		197	715	9	0.0207852		47	446	2	0.00557103		14	413	1	0.00438596		189	707	3	0.0111111
178	696	54	0.0666667		82	481	8	0.0184758		97	496	2	0.00557103		97	496	1	0.00438596		241	759	3	0.0111111
220	738	52	0.0641975		117	516	7	0.0161663		121	520	2	0.00557103		172	690	1	0.00438596		191	709	2	0.00740741
121	520	46	0.0567901		193	711	7	0.0161663		178	696	2	0.00557103		185	703	1	0.00438596		243	761	2	0.00740741
184	702	35	0.0432099		42	441	2	0.00461894		249	767	2	0.00557103		187	705	1	0.00438596		91	490	1	0.0037037
39	438	34	0.0419753		89	488	2	0.00461894		44	443	1	0.00278552		213	731	1	0.00438596		97	496	1	0.0037037
175	693	28	0.0345679		177	695	2	0.00461894		79	478	1	0.00278552		243	761	1	0.00438596		117	516	1	0.0037037
132	531	23	0.0283951		189	707	2	0.00461894		100	499	1	0.00278552							212	730	1	0.0037037
97	496	17	0.0209877		192	710	2	0.00461894		104	503	1	0.00278552							213	731	1	0.0037037
192	710	16	0.0197531		21	420	1	0.00230947		124	523	1	0.00278552
191	709	12	0.0148148		22	421	1	0.00230947		254	772	1	0.00278552
82	481	11	0.0135802		45	444	1	0.00230947
185	703	11	0.0135802		55	454	1	0.00230947
197	715	9	0.0111111		91	490	1	0.00230947
49	448	8	0.00987654		92	491	1	0.00230947
193	711	7	0.00864198		173	691	1	0.00230947
103	502	6	0.00740741		185	703	1	0.00230947
42	441	5	0.00617284		219	737	1	0.00230947
105	504	5	0.00617284
188	706	5	0.00617284
189	707	5	0.00617284
241	759	5	0.00617284
179	697	4	0.00493827
182	700	3	0.0037037
47	446	2	0.00246914
249	767	2	0.00246914
21	420	1	0.00123457
22	421	1	0.00123457
44	443	1	0.00123457
45	444	1	0.00123457
55	454	1	0.00123457
79	478	1	0.00123457
100	499	1	0.00123457
104	503	1	0.00123457
124	523	1	0.00123457
187	705	1	0.00123457
219	737	1	0.00123457
254	772	1	0.00123457
