# Supplementary material for: Excitatory and inhibitory D-serine binding to the NMDA receptor
Source: eLife. 2022 Oct 27;11:e77645. doi: 10.7554/eLife.77645 (PMC9612912; doi:10.7554/eLife.77645)
Supplement: Figure 1—source data 4. [file elife-77645-fig1-data4.xlsx]

## Sheet: 9_conditional_prob_N2
	20 D-Ser glyc					20 D-Ser glyc 2020						20 D-Ser glyc 2021					10 D-Ser 10 Glu glyc
sucessful binding events	11					28						6					5
random associations	13254					18125						12647					8871
resid (model)	resid (Uniprot)	n_success	n_fail	% success		resid (model)	resid (Uniprot)	n_success	n_fail	% success		resid (model)	resid (Uniprot)	n_success	n_fail	% success	resid (model)	resid (Uniprot)	n_success	n_fail
118	517	11	342	3.11615		118	517	26	404	6.04651		118	517	6	229	2.55319	118	517	4	173
116	515	11	133	7.63889		116	515	25	130	16.129		174	692	6	212	2.75229	116	515	4	49
169	687	11	444	2.41758		169	687	24	393	5.7554		116	515	6	25	19.3548	85	484	4	184
88	487	11	358	2.98103		95	494	21	190	9.95261		169	687	6	224	2.6087	174	692	3	135
174	692	10	423	2.30947		174	692	19	328	5.4755		171	689	5	57	8.06452	169	687	3	194
112	511	10	29	25.641		88	487	19	666	2.77372		88	487	5	331	1.4881	171	689	3	122
171	689	10	178	5.31915		92	491	19	672	2.74964		85	484	5	152	3.18471	89	488	3	281
85	484	8	268	2.89855		171	689	17	106	13.8211		14	413	4	66	5.71429	88	487	3	235
175	693	8	82	8.88889		112	511	16	13	55.1724		112	511	4	6	40	14	413	2	65
14	413	7	174	3.8674		14	413	15	116	11.4504		95	494	4	138	2.8169	112	511	2	9
212	730	7	82	7.86517		89	488	15	653	2.24551		177	695	4	218	1.8018	117	516	2	148
177	695	7	471	1.46444		85	484	15	507	2.87356		89	488	4	376	1.05263	92	491	2	360
89	488	6	435	1.36054		83	482	15	271	5.24476		92	491	4	508	0.78125	91	490	2	382
241	759	6	22	21.4286		173	691	14	331	4.05797		83	482	4	213	1.84332	83	482	2	158
173	691	5	295	1.66667		97	496	14	19	42.4242		97	496	4	3	57.1429	82	481	2	109
178	696	5	459	1.07759		212	730	13	42	23.6364		212	730	3	15	16.6667	49	448	2	459
117	516	4	279	1.41343		94	493	13	212	5.77778		173	691	3	212	1.39535	105	504	2	267
91	490	3	697	0.428571		177	695	12	540	2.17391		94	493	3	139	2.11268	212	730	1	24
132	531	3	11	21.4286		117	516	11	343	3.10734		13	412	3	173	1.70455	95	494	1	124
97	496	3	0	100		13	412	11	263	4.0146		121	520	3	252	1.17647	177	695	1	148
95	494	2	128	1.53846		91	490	10	806	1.22549		117	516	2	195	1.01523	196	714	1	263
92	491	2	584	0.341297		192	710	9	393	2.23881		91	490	2	621	0.321027	121	520	1	177
13	412	2	245	0.809717		82	481	8	177	4.32432		196	714	2	362	0.549451	184	702	1	169
83	482	2	287	0.692042		196	714	6	528	1.1236		178	696	2	365	0.544959	175	693	1	15
192	710	2	398	0.5		178	696	6	254	2.30769		220	738	2	184	1.07527	97	496	1	9
189	707	2	728	0.273973		188	706	6	543	1.0929		39	438	2	156	1.26582	191	709	1	350
179	697	2	153	1.29032		121	520	5	385	1.28205		184	702	1	263	0.378788	103	502	1	240
196	714	1	547	0.182482		175	693	5	30	14.2857		192	710	1	209	0.47619	42	441	1	223
220	738	1	302	0.330033		220	738	4	353	1.12045		191	709	1	492	0.20284	188	706	1	269
121	520	1	277	0.359712		185	703	4	588	0.675676		82	481	1	144	0.689655	47	446	1	342
184	702	1	312	0.319489		103	502	4	394	1.00503		197	715	1	364	0.273973	44	443	1	205
39	438	1	215	0.462963		39	438	3	203	1.45631		193	711	1	421	0.236967	79	478	1	61
185	703	1	466	0.214133		132	531	3	18	14.2857		103	502	1	327	0.304878	100	499	1	97
105	504	1	335	0.297619		191	709	3	527	0.566038		42	441	1	377	0.26455	173	691	0	202
219	737	1	274	0.363636		197	715	3	516	0.578035		188	706	1	229	0.434783	94	493	0	131
94	493	0	135	0		189	707	3	809	0.369458		21	420	1	352	0.283286	13	412	0	150
191	709	0	427	0		241	759	3	10	23.0769		22	421	1	387	0.257732	178	696	0	232
82	481	0	196	0		187	705	3	180	1.63934		45	444	1	471	0.211864	220	738	0	155
197	715	0	502	0		184	702	2	416	0.478469		55	454	1	223	0.446429	39	438	0	131
49	448	0	644	0		193	711	2	551	0.361664		175	693	0	12	0	132	531	0	2
193	711	0	477	0		42	441	2	452	0.440529		132	531	0	0	#DIV/0!	192	710	0	171
103	502	0	306	0		182	700	2	300	0.662252		185	703	0	434	0	185	703	0	304
42	441	0	375	0		249	767	2	301	0.660066		49	448	0	726	0	197	715	0	276
188	706	0	310	0		21	420	2	516	0.3861		105	504	0	380	0	193	711	0	307
182	700	0	268	0		47	446	1	802	0.124533		189	707	0	572	0	189	707	0	489
47	446	0	506	0		22	421	1	589	0.169492		241	759	0	0	#DIV/0!	241	759	0	3
249	767	0	230	0		55	454	1	347	0.287356		179	697	0	102	0	179	697	0	65
21	420	0	423	0		104	503	1	566	0.176367		182	700	0	174	0	182	700	0	95
22	421	0	418	0		124	523	1	111	0.892857		47	446	0	559	0	249	767	0	161
44	443	0	297	0		254	772	1	122	0.813008		249	767	0	257	0	21	420	0	290
45	444	0	497	0		49	448	0	961	0		44	443	0	303	0	22	421	0	298
55	454	0	225	0		105	504	0	481	0		79	478	0	84	0	45	444	0	319
79	478	0	55	0		179	697	0	87	0		100	499	0	135	0	55	454	0	173
100	499	0	89	0		44	443	0	372	0		104	503	0	443	0	104	503	0	307
104	503	0	431	0		45	444	0	670	0		124	523	0	87	0	124	523	0	63
124	523	0	83	0		79	478	0	80	0		187	705	0	80	0	187	705	0	95
187	705	0	58	0		100	499	0	140	0		219	737	0	189	0	219	737	0	160
254	772	0	87	0		219	737	0	325	0		254	772	0	100	0	254	772	0	55
																	​
			301.241	28.5046					363.828	24.2199					247.034	24.6873
	20 D-Ser glyc	10568.2	10.5682
	20 D-Ser glyc 2020	15021.8	15.0218
	20 D-Ser glyc 2021	10006.6	10.0066
							25.8039
							2.35051
