# Supplementary material for: Excitatory and inhibitory D-serine binding to the NMDA receptor
Source: eLife. 2022 Oct 27;11:e77645. doi: 10.7554/eLife.77645 (PMC9612912; doi:10.7554/eLife.77645)
Supplement: Figure 2—source data 1. [file elife-77645-fig2-data1.xlsx]

## Sheet: 4_GluN1
Path ID	Event Type	Ligand ID	Start frame	End Frame	Event duration (ns)	Time bound (ns)	Time apo after (ns)	Median (xi1, xi2)	Dataset	Summary Data		Flipped out?	Write manually?
100	B	LA10	37805	37838	7.92	290.4		13.4 14.0	10 D-Ser 10 Glu noglyc	62660	frames
101	U	LA10	39047	39107	14.4		5652.72	11.3 13.2	10 D-Ser 10 Glu noglyc	15.0384	microseconds
200	B	LA4	19108	19125	4.08	819.6		17.5 13.8	10 D-Ser 10 Glu glyc	62620	frames
201	U	LA4	22539	22554	3.6		1102.08	16.8 12.6	10 D-Ser 10 Glu glyc	15.0288	microseconds
202	B	LA8	27147	27186	9.36	8504.4		17.3 12.8	10 D-Ser 10 Glu glyc
300	B	LA13	13804	13809	1.2	0.48		20.5 15.8	20 D-Ser noglyc	62559	frames
301	U	LA13	13810	13814	0.96		396.24	20.3 15.3	20 D-Ser noglyc	15.0142	microseconds
302	B	LA5	15466	15471	1.2	2.4		19.1 12.6	20 D-Ser noglyc
303	U	LA5	15480	15486	1.44		212.64	20.3 13.8	20 D-Ser noglyc
304	B	LA5	16373	16374	0.24	0.96		18.2 17.0	20 D-Ser noglyc
305	U	LA5	16377	16377	0		12.72	16.3 16.4	20 D-Ser noglyc
306	B	LA15	16431	16431	0	0.24		16.2 14.3	20 D-Ser noglyc
307	U	LA15	16431	16433	0.48		60.96	16.7 15.6	20 D-Ser noglyc
308	B	LA11	16688	16696	1.92	0.96		19.2 16.1	20 D-Ser noglyc
309	U	LA11	16699	16700	0.24		126.72	18.7 15.4	20 D-Ser noglyc
310	B	LA16	17229	17261	7.68	0.24		17.4 14.7	20 D-Ser noglyc
311	U	LA16	17261	17262	0.24		245.28	17.9 14.0	20 D-Ser noglyc
312	B	LA19	18285	18293	1.92	1.2		12.5 12.4	20 D-Ser noglyc
313	U	LA19	18297	18298	0.24		5.28	14.0 13.0	20 D-Ser noglyc
314	B	LA19	18321	18325	0.96	0.24		12.9 12.5	20 D-Ser noglyc
315	U	LA19	18325	18325	0		37.2	13.5 12.7	20 D-Ser noglyc
316	B	LA12	18481	18489	1.92	0.72		13.3 13.1	20 D-Ser noglyc
317	U	LA12	18491	18498	1.68		109.44	12.8 13.2	20 D-Ser noglyc
318	B	LA5	18955	18963	1.92	6.24		13.4 12.8	20 D-Ser noglyc
319	U	LA5	18988	18989	0.24		5.52	13.6 13.9	20 D-Ser noglyc
320	B	LA7	19013	19016	0.72	0.24		12.3 13.1	20 D-Ser noglyc
321	U	LA7	19016	19016	0		6.24	12.9 13.1	20 D-Ser noglyc
322	B	LA17	19043	19045	0.48	0.48		13.4 13.4	20 D-Ser noglyc
323	U	LA17	19046	19064	4.32		583.92	13.2 13.2	20 D-Ser noglyc
324	B	LA3	21498	21501	0.72	0.24		16.5 13.3	20 D-Ser noglyc
325	U	LA3	21501	21515	3.36		3766.32	16.1 12.7	20 D-Ser noglyc
326	B	LA19	37209	37223	3.36	0.24		16.9 13.6	20 D-Ser noglyc
327	U	LA19	37223	37226	0.72		109.92	17.1 14.0	20 D-Ser noglyc
328	B	LA6	37685	37694	2.16	3.84		16.0 13.3	20 D-Ser noglyc
329	U	LA6	37709	37710	0.24		1.2	16.1 13.7	20 D-Ser noglyc
330	B	LA7	37716	37718	0.48	0.48		15.9 13.4	20 D-Ser noglyc
331	U	LA7	37719	37724	1.2		1956.48	15.5 13.5	20 D-Ser noglyc
332	B	LA2	45877	45879	0.48	0.72		14.5 12.7	20 D-Ser noglyc
333	U	LA2	45881	45883	0.48		130.8	14.1 13.3	20 D-Ser noglyc
334	B	LA6	46429	46429	0	1.68		16.0 13.6	20 D-Ser noglyc
335	U	LA6	46435	46464	6.96		33.36	15.3 14.1	20 D-Ser noglyc
336	B	LA9	46604	46609	1.2	0.72		15.0 13.1	20 D-Ser noglyc
337	U	LA9	46611	46611	0		315.12	15.4 13.5	20 D-Ser noglyc
338	B	LA6	47925	47945	4.8	0.24		15.1 13.0	20 D-Ser noglyc
339	U	LA6	47945	47951	1.44		676.56	15.3 13.6	20 D-Ser noglyc
340	B	LA17	50771	50776	1.2	0.48		14.8 13.3	20 D-Ser noglyc
341	U	LA17	50777	50778	0.24		116.16	15.0 13.4	20 D-Ser noglyc
342	B	LA11	51263	51263	0	0.96		16.0 13.6	20 D-Ser noglyc
343	U	LA11	51266	51276	2.4		97.92	16.3 13.7	20 D-Ser noglyc
344	B	LA18	51685	51687	0.48	0.24		16.4 14.6	20 D-Ser noglyc
345	U	LA18	51687	51694	1.68		74.88	14.9 14.6	20 D-Ser noglyc
346	B	LA20	52007	52017	2.4	0.24		16.3 14.5	20 D-Ser noglyc
347	U	LA20	52017	52022	1.2		545.76	15.9 14.2	20 D-Ser noglyc
348	B	LA13	54297	54303	1.44	0.96		16.3 14.2	20 D-Ser noglyc
349	U	LA13	54306	54309	0.72		11.52	17.3 14.0	20 D-Ser noglyc
350	B	LA5	54358	54361	0.72	0.48		16.4 14.3	20 D-Ser noglyc
351	U	LA5	54362	54373	2.64		205.2	17.1 14.8	20 D-Ser noglyc
352	B	LA1	55229	55238	2.16	0.24		17.2 14.4	20 D-Ser noglyc
353	U	LA1	55238	55240	0.48		13.92	17.3 14.6	20 D-Ser noglyc
354	B	LA10	55299	55299	0	4.08		15.6 12.7	20 D-Ser noglyc
355	U	LA10	55315	55315	0		12	15.7 13.5	20 D-Ser noglyc
356	B	LA16	55366	55366	0	0.72		15.3 12.4	20 D-Ser noglyc
357	U	LA16	55368	55368	0		228.48	15.7 13.2	20 D-Ser noglyc
358	B	LA11	56321	56363	10.08	4.32		16.0 13.8	20 D-Ser noglyc
359	U	LA11	56380	56380	0		254.88	15.3 13.1	20 D-Ser noglyc
360	B	LA2	57443	57453	2.4	0.24		15.7 14.1	20 D-Ser noglyc
361	U	LA2	57453	57453	0		547.68	15.4 14.5	20 D-Ser noglyc
362	B	LA8	59736	59736	0	0.48		16.9 14.5	20 D-Ser noglyc
363	U	LA8	59737	59740	0.72		1.2	17.0 14.1	20 D-Ser noglyc
364	B	LA15	59746	59755	2.16	0.24		16.0 13.9	20 D-Ser noglyc
365	U	LA15	59755	59756	0.24		624.48	16.1 13.8	20 D-Ser noglyc
366	B	LA7	62359	62362	0.72	4.8		15.5 13.6	20 D-Ser noglyc
367	U	LA7	62381	62381	0		42.72	14.9 12.6	20 D-Ser noglyc
400	B	LA1	21138	21161	5.52	0.24		17.1 14.4	20 D-Ser glyc	44034	frames
401	U	LA1	21161	21164	0.72		740.4	17.2 14.1	20 D-Ser glyc	10.5682	microseconds
402	B	LA18	24250	24254	0.96	0.96		19.1 14.6	20 D-Ser glyc
403	U	LA18	24257	24266	2.16		3.12	18.7 15.3	20 D-Ser glyc
404	B	LA9	24280	24283	0.72	12.96		18.5 13.9	20 D-Ser glyc
405	U	LA9	24336	24356	4.8		121.92	18.7 14.2	20 D-Ser glyc
406	B	LA7	24865	24884	4.56	17.04		17.2 13.8	20 D-Ser glyc
407	U	LA7	24954	24962	1.92		289.68	18.5 13.6	20 D-Ser glyc
408	B	LA9	26170	26180	2.4	1.2		20.9 19.0	20 D-Ser glyc
409	U	LA9	26184	26191	1.68		21.84	21.9 20.0	20 D-Ser glyc
410	B	LA3	26283	26289	1.44	1.2		20.5 18.7	20 D-Ser glyc
411	U	LA3	26293	26319	6.24		926.88	19.9 18.4	20 D-Ser glyc
412	B	LA8	30182	30188	1.44	1035.84		16.4 14.2	20 D-Ser glyc
413	U	LA8	34503	34528	6		80.4	16.6 14.8	20 D-Ser glyc
414	B	LA20	34864	34877	3.12	360.72		19.4 17.0	20 D-Ser glyc
415	U	LA20	36379	36383	0.96		309.6	18.1 16.5	20 D-Ser glyc
416	B	LA8	37674	37680	1.44	20.64		17.4 14.4	20 D-Ser glyc
417	U	LA8	37765	37771	1.44		438.24	18.2 17.0	20 D-Ser glyc
418	B	LA11	39598	39603	1.2	210.72		22.3 19.5	20 D-Ser glyc
419	U	LA11	40480	40516	8.64		21.84	21.7 19.3	20 D-Ser glyc
420	B	LA12	40608	40618	2.4	30.24		23.2 20.8	20 D-Ser glyc
421	U	LA12	40743	40749	1.44		497.04	21.4 19.1	20 D-Ser glyc
422	B	LA19	42821	42821	0	0.72		22.3 17.0	20 D-Ser glyc
423	U	LA19	42823	42824	0.24		78	20.9 16.2	20 D-Ser glyc
424	B	LA12	43150	43151	0.24	8.16		19.7 15.0	20 D-Ser glyc
425	U	LA12	43184	43187	0.72		187.68	20.2 14.9	20 D-Ser glyc
426	B	LA13	43970	44002	7.68	1.44		18.7 15.1	20 D-Ser glyc
427	U	LA13	44007	44030	5.52		0.96	18.9 14.2	20 D-Ser glyc
800	B	LA15	10020	10022	0.48	0.72		11.7 13.4	20 D-Ser glyc 2021	41694	frames
801	U	LA15	10024	10026	0.48		255.36	10.9 13.4	20 D-Ser glyc 2021	10.0066	microseconds
802	B	LA4	11091	11115	5.76	0.72		12.4 13.8	20 D-Ser glyc 2021
803	U	LA4	11117	11119	0.48		228.96	12.2 13.9	20 D-Ser glyc 2021
804	B	LA10	12074	12076	0.48	0.96		11.1 11.9	20 D-Ser glyc 2021
805	U	LA10	12079	12080	0.24		11.52	10.9 12.7	20 D-Ser glyc 2021
806	B	LA11	12129	12130	0.24	4.8		11.0 13.6	20 D-Ser glyc 2021
807	U	LA11	12149	12154	1.2		19.2	11.1 12.8	20 D-Ser glyc 2021
808	B	LA3	12235	12243	1.92	8.88		11.4 13.4	20 D-Ser glyc 2021
809	U	LA3	12279	12304	6		251.76	10.9 12.6	20 D-Ser glyc 2021
810	B	LA12	13354	13354	0	0.96		10.3 14.8	20 D-Ser glyc 2021
811	U	LA12	13357	13362	1.2		7.2	10.9 14.1	20 D-Ser glyc 2021
812	B	LA9	13393	13397	0.96	0.48		11.2 14.3	20 D-Ser glyc 2021
813	U	LA9	13398	13406	1.92		208.8	10.9 13.1	20 D-Ser glyc 2021
814	B	LA12	14277	14277	0	1.44		11.0 14.3	20 D-Ser glyc 2021
815	U	LA12	14282	14283	0.24		214.56	11.6 14.2	20 D-Ser glyc 2021
816	B	LA19	15178	15178	0	3.6		10.9 13.5	20 D-Ser glyc 2021
817	U	LA19	15192	15192	0		1.2	10.8 12.3	20 D-Ser glyc 2021
818	B	LA1	15198	15198	0	3.12		11.1 12.8	20 D-Ser glyc 2021
819	U	LA1	15210	15218	1.92		0	10.7 13.0	20 D-Ser glyc 2021
820	B	LA7	15218	15236	4.32	1.44		10.7 13.1	20 D-Ser glyc 2021
821	U	LA7	15241	15242	0.24		69.36	10.8 13.0	20 D-Ser glyc 2021
822	B	LA15	15532	15538	1.44	0.48		11.0 13.5	20 D-Ser glyc 2021
823	U	LA15	15539	15542	0.72		30	10.5 13.0	20 D-Ser glyc 2021
824	B	LA6	15668	15668	0	1.92		10.9 13.3	20 D-Ser glyc 2021
825	U	LA6	15675	15676	0.24		136.8	10.7 12.9	20 D-Ser glyc 2021
826	B	LA14	16247	16261	3.36	0.96		10.8 13.0	20 D-Ser glyc 2021
827	U	LA14	16264	16264	0		37.44	11.0 12.7	20 D-Ser glyc 2021
828	B	LA7	16421	16421	0	0.48		11.1 12.4	20 D-Ser glyc 2021
829	U	LA7	16422	16434	2.88		0.24	10.8 12.6	20 D-Ser glyc 2021
830	B	LA6	16436	16437	0.24	2.64		10.7 13.0	20 D-Ser glyc 2021
831	U	LA6	16447	16448	0.24		20.4	10.7 13.4	20 D-Ser glyc 2021
832	B	LA19	16534	16534	0	1.68		10.5 13.0	20 D-Ser glyc 2021
833	U	LA19	16540	16545	1.2		0.48	10.9 13.0	20 D-Ser glyc 2021
834	B	LA19	16548	16548	0	0.48		10.8 12.5	20 D-Ser glyc 2021
835	U	LA19	16549	16550	0.24		13.68	10.8 12.7	20 D-Ser glyc 2021
836	B	LA7	16608	16671	15.12	0.24		10.8 13.1	20 D-Ser glyc 2021
837	U	LA7	16671	16671	0		156.72	10.5 12.6	20 D-Ser glyc 2021
838	B	LA18	17325	17331	1.44	0.24		11.1 13.3	20 D-Ser glyc 2021
839	U	LA18	17331	17341	2.4		0.72	10.9 13.4	20 D-Ser glyc 2021
840	B	LA18	17345	17348	0.72	0.72		10.8 14.1	20 D-Ser glyc 2021
841	U	LA18	17350	17350	0		54.72	10.5 14.5	20 D-Ser glyc 2021
842	B	LA12	17579	17581	0.48	17.04		10.7 13.0	20 D-Ser glyc 2021
843	U	LA12	17651	17675	5.76		9.6	11.1 12.9	20 D-Ser glyc 2021
844	B	LA9	17716	17720	0.96	8.16		11.1 13.0	20 D-Ser glyc 2021
845	U	LA9	17753	17757	0.96		32.64	11.2 13.3	20 D-Ser glyc 2021
846	B	LA4	17894	17894	0	24		11.2 13.4	20 D-Ser glyc 2021
847	U	LA4	17993	17996	0.72		83.04	11.2 13.5	20 D-Ser glyc 2021
848	B	LA8	18343	18345	0.48	3.12		11.5 14.0	20 D-Ser glyc 2021
849	U	LA8	18357	18358	0.24		24.48	11.3 14.5	20 D-Ser glyc 2021
850	B	LA15	18461	18461	0	10.32		11.4 14.9	20 D-Ser glyc 2021
851	U	LA15	18503	18504	0.24		58.56	11.4 13.0	20 D-Ser glyc 2021
852	B	LA18	18749	18750	0.24	2.4		11.1 12.7	20 D-Ser glyc 2021
853	U	LA18	18759	18760	0.24		29.28	11.4 13.8	20 D-Ser glyc 2021
854	B	LA4	18883	18883	0	0.24		11.2 13.5	20 D-Ser glyc 2021
855	U	LA4	18883	18883	0		136.8	11.2 13.5	20 D-Ser glyc 2021
856	B	LA7	19454	19456	0.48	18.48		10.9 13.9	20 D-Ser glyc 2021
857	U	LA7	19532	19533	0.24		13.2	11.2 15.0	20 D-Ser glyc 2021
858	B	LA15	19589	19593	0.96	18.48		10.7 13.1	20 D-Ser glyc 2021
859	U	LA15	19669	19671	0.48		224.4	10.8 12.9	20 D-Ser glyc 2021
860	B	LA9	20607	20624	4.08	11.52		10.7 13.5	20 D-Ser glyc 2021
861	U	LA9	20671	20675	0.96		34.56	10.6 14.1	20 D-Ser glyc 2021
862	B	LA3	20820	20821	0.24	0.24		11.0 13.3	20 D-Ser glyc 2021
863	U	LA3	20821	20824	0.72		0.48	10.9 13.2	20 D-Ser glyc 2021
864	B	LA3	20827	20828	0.24	1.92		11.0 13.1	20 D-Ser glyc 2021
865	U	LA3	20835	20837	0.48		49.92	10.8 12.5	20 D-Ser glyc 2021
866	B	LA10	21046	21047	0.24	3.6		11.7 12.8	20 D-Ser glyc 2021
867	U	LA10	21061	21063	0.48		41.04	11.3 12.9	20 D-Ser glyc 2021
868	B	LA3	21235	21236	0.24	3.12		11.4 12.8	20 D-Ser glyc 2021
869	U	LA3	21248	21249	0.24		139.44	11.1 12.2	20 D-Ser glyc 2021
870	B	LA18	21831	21835	0.96	1.44		10.4 14.0	20 D-Ser glyc 2021
871	U	LA18	21840	21865	6		1.68	10.6 13.4	20 D-Ser glyc 2021
872	B	LA7	21873	21876	0.72	0.24		10.7 13.7	20 D-Ser glyc 2021
873	U	LA7	21876	21877	0.24		104.64	11.1 13.8	20 D-Ser glyc 2021
874	B	LA18	22314	22321	1.68	0.72		11.0 13.0	20 D-Ser glyc 2021
875	U	LA18	22323	22339	3.84		26.64	10.9 12.9	20 D-Ser glyc 2021
876	B	LA10	22451	22452	0.24	0.72		10.4 13.4	20 D-Ser glyc 2021
877	U	LA10	22454	22454	0		42.72	10.6 13.0	20 D-Ser glyc 2021
878	B	LA1	22633	22633	0	0.72		11.5 13.8	20 D-Ser glyc 2021
879	U	LA1	22635	22635	0		15.84	11.5 13.8	20 D-Ser glyc 2021
880	B	LA12	22702	22709	1.68	23.76		11.0 12.8	20 D-Ser glyc 2021
881	U	LA12	22807	22813	1.44		176.4	11.0 12.9	20 D-Ser glyc 2021
882	B	LA20	23549	23555	1.44	0.24		10.6 14.4	20 D-Ser glyc 2021
883	U	LA20	23555	23557	0.48		3.36	10.6 14.4	20 D-Ser glyc 2021
884	B	LA14	23572	23575	0.72	0.24		10.5 14.1	20 D-Ser glyc 2021
885	U	LA14	23575	23575	0		15.36	10.7 14.0	20 D-Ser glyc 2021
886	B	LA6	23640	23645	1.2	0.96		10.7 14.1	20 D-Ser glyc 2021
887	U	LA6	23648	23679	7.44		6.24	10.8 14.4	20 D-Ser glyc 2021
888	B	LA13	23706	23708	0.48	0.96		11.4 14.1	20 D-Ser glyc 2021
889	U	LA13	23711	23719	1.92		0	10.2 14.1	20 D-Ser glyc 2021
890	B	LA2	23717	23722	1.2	1.68		10.2 14.0	20 D-Ser glyc 2021
891	U	LA2	23728	23742	3.36		0	11.1 14.5	20 D-Ser glyc 2021
892	B	LA9	23734	23736	0.48	1.92		12.0 14.6	20 D-Ser glyc 2021
893	U	LA9	23743	23743	0		93.36	10.4 14.0	20 D-Ser glyc 2021
894	B	LA20	24133	24133	0	0.48		10.6 13.6	20 D-Ser glyc 2021
895	U	LA20	24134	24135	0.24		4214.16	11.2 14.4	20 D-Ser glyc 2021
			System 1	System 2	System 3	System 4		VOL
		Total Time	15028.8	10568.2	15021.8	10006.6	50625.4	1.694e-21
		Time not free	9341.04	1777.68	0	308.16
		Time free	5687.76	8790.48	15021.8	9698.4
		denominator	5.57543e-08	1.72337e-07	2.94503e-07	1.90137e-07
	all	numerator (Nb)	2	14	0	48
	>100 ns	numerator (Nb)	2	3	0	0
		k_on	8.97953e+07	all
			7.01526e+06	>100 ns
		Kd	192558	1.56378e+06	N/A	9.95267e+06
		dG_bind	-7.49107	-8.78048		-9.91985
