# Supplementary material for: Excitatory and inhibitory D-serine binding to the NMDA receptor
Source: eLife. 2022 Oct 27;11:e77645. doi: 10.7554/eLife.77645 (PMC9612912; doi:10.7554/eLife.77645)
Supplement: Figure 2—source data 2. [file elife-77645-fig2-data2.xlsx]

## Sheet: 6_contact_freq_N1_glyc
GluN1 D-serine glyc
Total					Cluster 1					Cluster 2					Cluster 3					Cluster 4
resid (model)	resid (Uniprot)	count	frequency		resid (model)	resid (Uniprot)	count	frequency		resid (model)	resid (Uniprot)	count	frequency		resid (model)	resid (Uniprot)	count	frequency		resid (model)	resid (Uniprot)	count	frequency
131	523	401	1		131	523	99	1		130	522	130	1		255	763	10	1		97	489	188	1
97	489	269	0.670823		180	688	75	0.757576		131	523	125	0.961538		257	765	10	1		131	523	170	0.904255
130	522	196	0.488778		91	483	74	0.747475		104	496	116	0.892308		131	523	7	0.7		105	497	161	0.856383
105	497	178	0.44389		97	489	70	0.707071		133	525	81	0.623077		134	526	7	0.7		106	498	105	0.558511
104	496	127	0.316708		130	522	56	0.565657		187	695	63	0.484615		3	395	5	0.5		103	495	97	0.515957
103	495	119	0.296758		224	732	56	0.565657		186	694	20	0.153846		133	525	4	0.4		134	526	17	0.0904255
106	498	108	0.269327		126	518	51	0.515152		134	526	14	0.107692		103	495	1	0.1		89	481	16	0.0851064
133	525	99	0.246883		89	481	46	0.464646		97	489	11	0.0846154		105	497	1	0.1		133	525	14	0.0744681
187	695	85	0.21197		94	486	46	0.464646		196	704	10	0.0769231		106	498	1	0.1		104	496	10	0.0531915
180	688	80	0.199501		179	687	46	0.464646		95	487	8	0.0615385		256	764	1	0.1		115	507	10	0.0531915
91	483	74	0.184539		128	520	40	0.40404		199	707	8	0.0615385		258	766	1	0.1		130	522	10	0.0531915
89	481	62	0.154613		13	405	37	0.373737		96	488	7	0.0538462		261	769	1	0.1		112	504	9	0.0478723
224	732	58	0.144638		178	686	32	0.323232		128	520	7	0.0538462							101	493	8	0.0425532
126	518	56	0.139651		223	731	28	0.282828		195	703	7	0.0538462							102	494	6	0.0319149
94	486	50	0.124688		96	488	24	0.242424		102	494	6	0.0461538							48	440	4	0.0212766
128	520	47	0.117207		144	536	22	0.222222		177	685	6	0.0461538							50	442	4	0.0212766
179	687	46	0.114713		187	695	21	0.212121		126	518	5	0.0384615							100	492	3	0.0159574
134	526	39	0.0972569		214	722	21	0.212121		180	688	5	0.0384615							54	446	1	0.00531915
13	405	37	0.0922693		95	487	19	0.191919		182	690	5	0.0384615							95	487	1	0.00531915
178	686	33	0.0822943		211	719	19	0.191919		94	486	4	0.0307692							99	491	1	0.00531915
96	488	31	0.0773067		103	495	17	0.171717		103	495	4	0.0307692							107	499	1	0.00531915
186	694	30	0.074813		107	499	17	0.171717		129	521	4	0.0307692							117	509	1	0.00531915
95	487	28	0.0698254		205	713	17	0.171717		200	708	3	0.0230769							187	695	1	0.00531915
223	731	28	0.0698254		235	743	17	0.171717		248	756	3	0.0230769							196	704	1	0.00531915
144	536	22	0.0548628		100	492	16	0.161616		99	491	2	0.0153846							48	440
100	492	21	0.0523691		105	497	16	0.161616		100	492	2	0.0153846
214	722	21	0.0523691		208	716	16	0.161616		188	696	2	0.0153846
211	719	19	0.0473815		291	799	16	0.161616		224	732	2	0.0153846
107	499	18	0.0448878		292	800	15	0.151515		178	686	1	0.00769231
102	494	17	0.042394		204	712	13	0.131313		190	698	1	0.00769231
205	713	17	0.042394		215	723	13	0.131313		201	709	1	0.00769231
235	743	17	0.042394		248	756	11	0.111111		202	710	1	0.00769231
208	716	16	0.0399002		186	694	10	0.10101
291	799	16	0.0399002		231	739	9	0.0909091
292	800	15	0.0374065		234	742	9	0.0909091
248	756	14	0.0349127		287	795	8	0.0808081
204	712	13	0.032419		12	404	7	0.0707071
215	723	13	0.032419		14	406	5	0.0505051
115	507	12	0.0299252		102	494	5	0.0505051
112	504	11	0.0274314		20	412	3	0.030303
196	704	11	0.0274314		49	441	3	0.030303
101	493	10	0.0249377		56	448	3	0.030303
255	763	10	0.0249377		177	685	3	0.030303
257	765	10	0.0249377		101	493	2	0.020202
177	685	9	0.0224439		106	498	2	0.020202
231	739	9	0.0224439		112	504	2	0.020202
234	742	9	0.0224439		115	507	2	0.020202
199	707	8	0.0199501		117	509	2	0.020202
287	795	8	0.0199501		151	543	2	0.020202
12	404	7	0.0174564		237	745	2	0.020202
195	703	7	0.0174564		50	442	1	0.010101
3	395	5	0.0124688		51	443	1	0.010101
14	406	5	0.0124688		61	453	1	0.010101
50	442	5	0.0124688		104	496	1	0.010101
182	690	5	0.0124688		134	526	1	0.010101
48	440	4	0.00997506		203	711	1	0.010101
129	521	4	0.00997506		288	796	1	0.010101
20	412	3	0.0074813
49	441	3	0.0074813
56	448	3	0.0074813
99	491	3	0.0074813
117	509	3	0.0074813
200	708	3	0.0074813
151	543	2	0.00498753
188	696	2	0.00498753
237	745	2	0.00498753
51	443	1	0.00249377
54	446	1	0.00249377
61	453	1	0.00249377
190	698	1	0.00249377
201	709	1	0.00249377
202	710	1	0.00249377
203	711	1	0.00249377
256	764	1	0.00249377
258	766	1	0.00249377
261	769	1	0.00249377
288	796	1	0.00249377
