# Supplementary material for: Excitatory and inhibitory D-serine binding to the NMDA receptor
Source: eLife. 2022 Oct 27;11:e77645. doi: 10.7554/eLife.77645 (PMC9612912; doi:10.7554/eLife.77645)
Supplement: Figure 2—source data 3. [file elife-77645-fig2-data3.xlsx]

## Sheet: 10_conditional_prob_N1
	20 D-Ser glyc					20 D-Ser glyc 2021						10 D-Ser 10 Glu glyc
sucessful binding events	14					48						2
random associations	13203					12494						8714
resid (model)	resid (Uniprot)	n_success	n_fail	% success		resid (model)	resid (Uniprot)	n_success	n_fail	% success		resid (model)	resid (Uniprot)	n_success	n_fail	% success
128	520	14	69	16.8675		104	496	40	389	9.32401		130	522	2	126	1.5625
94	486	12	146	7.59494		103	495	36	596	5.6962		180	688	2	10	16.6667
180	688	11	81	11.9565		106	498	33	240	12.0879		91	483	2	201	0.985222
178	686	10	433	2.25734		97	489	29	399	6.7757		89	481	2	268	0.740741
130	522	9	204	4.22535		105	497	29	299	8.84146		94	486	2	101	1.94175
179	687	9	86	9.47368		134	526	22	362	5.72917		128	520	2	19	9.52381
13	405	9	107	7.75862		133	525	18	355	4.82574		179	687	2	26	7.14286
96	488	9	343	2.55682		130	522	17	229	6.91057		13	405	2	23	8
144	536	9	16	36		102	494	14	529	2.57827		178	686	2	215	0.921659
248	756	9	23	28.125		187	695	8	291	2.67559		223	731	2	5	28.5714
97	489	8	427	1.83908		101	493	7	409	1.68269		144	536	2	4	33.3333
91	483	8	300	2.5974		100	492	6	602	0.986842		205	713	2	169	1.16959
89	481	7	381	1.80412		186	694	5	299	1.64474		208	716	2	338	0.588235
187	695	6	438	1.35135		107	499	5	78	6.0241		248	756	2	0	100
95	487	6	188	3.09278		115	507	5	381	1.29534		204	712	2	386	0.515464
177	685	6	421	1.40515		89	481	4	253	1.55642		177	685	2	245	0.809717
223	731	5	31	13.8889		96	488	3	185	1.59574		186	694	1	253	0.393701
100	492	5	612	0.810373		112	504	3	101	2.88462		107	499	1	173	0.574713
107	499	5	212	2.30415		255	763	3	322	0.923077		182	690	1	68	1.44928
103	495	4	611	0.650407		50	442	3	367	0.810811		203	711	1	183	0.543478
101	493	4	548	0.724638		99	491	3	432	0.689655		97	489	0	316	0
105	497	3	416	0.71599		94	486	2	104	1.88679		105	497	0	274	0
186	694	3	453	0.657895		196	704	2	501	0.397614		104	496	0	303	0
102	494	3	601	0.496689		257	765	2	472	0.421941		103	495	0	454	0
12	404	3	193	1.53061		129	521	2	58	3.33333		106	498	0	142	0
129	521	3	203	1.45631		49	441	2	317	0.626959		133	525	0	191	0
106	498	2	220	0.900901		188	696	2	193	1.02564		187	695	0	305	0
133	525	2	278	0.714286		51	443	2	359	0.554017		134	526	0	172	0
134	526	2	263	0.754717		256	764	2	375	0.530504		96	488	0	294	0
205	713	2	278	0.714286		180	688	1	5	16.6667		95	487	0	165	0
204	712	2	632	0.315457		128	520	1	20	4.7619		100	492	0	423	0
14	406	2	260	0.763359		95	487	1	44	2.22222		214	722	0	264	0
49	441	2	307	0.647249		208	716	1	498	0.200401		211	719	0	258	0
56	448	2	418	0.47619		199	707	1	395	0.252525		102	494	0	427	0
99	491	2	469	0.424628		195	703	1	138	0.719424		235	743	0	217	0
203	711	2	286	0.694444		3	395	1	407	0.245098		291	799	0	485	0
104	496	1	487	0.204918		182	690	1	94	1.05263		292	800	0	488	0
214	722	1	465	0.214592		48	440	1	167	0.595238		215	723	0	438	0
211	719	1	378	0.263852		117	509	1	328	0.303951		115	507	0	239	0
235	743	1	296	0.3367		200	708	1	690	0.144718		112	504	0	48	0
208	716	1	500	0.199601		54	446	1	406	0.2457		196	704	0	375	0
291	799	1	644	0.155039		190	698	1	460	0.21692		101	493	0	353	0
292	800	1	706	0.141443		201	709	1	341	0.292398		255	763	0	226	0
215	723	1	576	0.17331		258	766	1	159	0.625		257	765	0	305	0
115	507	1	340	0.293255		261	769	1	217	0.458716		231	739	0	35	0
112	504	1	74	1.33333		91	483	0	275	0		234	742	0	169	0
196	704	1	585	0.170648		179	687	0	10	0		199	707	0	313	0
231	739	1	103	0.961538		13	405	0	60	0		287	795	0	195	0
234	742	1	218	0.456621		178	686	0	167	0		12	404	0	108	0
199	707	1	494	0.20202		223	731	0	5	0		195	703	0	117	0
287	795	1	366	0.27248		144	536	0	3	0		3	395	0	302	0
195	703	1	173	0.574713		214	722	0	449	0		14	406	0	123	0
50	442	1	352	0.283286		211	719	0	415	0		50	442	0	262	0
182	690	1	151	0.657895		205	713	0	271	0		48	440	0	125	0
48	440	1	148	0.671141		235	743	0	341	0		129	521	0	84	0
20	412	1	366	0.27248		291	799	0	741	0		20	412	0	231	0
117	509	1	346	0.288184		292	800	0	781	0		49	441	0	227	0
200	708	1	723	0.138122		248	756	0	1	0		56	448	0	351	0
151	543	1	340	0.293255		204	712	0	514	0		99	491	0	307	0
188	696	1	333	0.299401		215	723	0	600	0		117	509	0	223	0
237	745	1	420	0.23753		177	685	0	277	0		200	708	0	465	0
51	443	1	355	0.280899		231	739	0	101	0		151	543	0	289	0
61	453	1	128	0.775194		234	742	0	284	0		188	696	0	152	0
201	709	1	392	0.254453		287	795	0	483	0		237	745	0	341	0
202	710	1	337	0.295858		12	404	0	204	0		51	443	0	293	0
288	796	1	467	0.213675		14	406	0	241	0		54	446	0	302	0
255	763	0	336	0		20	412	0	429	0		61	453	0	97	0
257	765	0	434	0		56	448	0	472	0		190	698	0	313	0
3	395	0	464	0		151	543	0	362	0		201	709	0	237	0
54	446	0	430	0		237	745	0	459	0		202	710	0	170	0
190	698	0	479	0		61	453	0	150	0		256	764	0	232	0
256	764	0	325	0		202	710	0	249	0		258	766	0	104	0
258	766	0	132	0		203	711	0	231	0		261	769	0	114	0
261	769	0	129	0		288	796	0	541	0		288	796	0	331	0
			337.108	31.8985					310.568	31.0364
						31.4674
						0.609576
	20 D-Ser glyc	10568.2	10.5682
	20 D-Ser glyc 2020	15021.8	15.0218
	20 D-Ser glyc 2021	10006.6	10.0066
