# Supplementary material for: Excitatory and inhibitory D-serine binding to the NMDA receptor
Source: eLife. 2022 Oct 27;11:e77645. doi: 10.7554/eLife.77645 (PMC9612912; doi:10.7554/eLife.77645)
Supplement: Figure 3—source data 1. [file elife-77645-fig3-data1.xlsx]

## Sheet: 8_bound_state_analysis
GluN2A D-serine					GluN2A glycine					GluN2A glu (inverted)					GluN1 D-Ser					GluN2A glu (crystal structure 2a5s)					GluN1 gly (crystal structure 1pb7)
resid (model)	resid (Uniprot)	count	frequency		resid (model)	resid (Uniprot)	count	frequency		resid (model)	resid (Uniprot)	count	frequency		resid (model)	resid (Uniprot)	count	frequency		resid (model)	resid (Uniprot)	count	frequency		resid (model)	resid (Uniprot)	count	frequency
119	518	34380	1		119	518	30779	1		119	485	25877	1		131	523	37019	1		86	485	1	1		92	484	1	1
114	513	34313	0.998051		213	731	30215	0.981676		114	513	25863	0.999459		224	732	37019	1		114	513	1	1		125	517	1	1
213	731	33879	0.985428		171	689	29527	0.959323		171	689	24789	0.957955		126	518	37016	0.999919		119	518	1	1		126	518	1	1
172	690	27461	0.798749		86	485	28992	0.941941		213	731	23819	0.92047		180	688	5802	0.15673		171	731	1	1		131	523	1	1
243	761	24427	0.7105		114	513	24532	0.797037		212	730	11209	0.433165		179	687	227	0.00613199		172	730	1	1		179	687	1	1
86	485	22574	0.656603		212	730	16022	0.52055		86	485	9179	0.354717		144	536	68	0.00183689		212	604	1	1		180	688	1	1
112	511	6659	0.193688		14	413	13721	0.445791		172	690	1591	0.0614832		248	756	6	0.000162079		213	690	1	1		224	732	1	1
14	413	4522	0.13153		243	761	4542	0.147568		243	761	975	0.0376782		13	405	4	0.000108053							250	758	1	1
171	689	4387	0.127603		112	511	4503	0.146301		112	511	197	0.00761294		128	520	3	8.10395e-05
212	730	2461	0.0715823							174	692	159	0.00614445
										88	487	112	0.00432817
										85	484	78	0.00301426
GluN2A D-serine (Min2)										14	413	62	0.00239595
resid (model)	resid (Uniprot)	count	frequency							116	515	12	0.000463732
119	518	2847	1
114	513	2727	0.95785
86	485	2258	0.793116
171	689	1001	0.351598
212	730	482	0.169301
243	761	283	0.0994029
112	511	269	0.0944854
213	731	118	0.0414471
174	692	103	0.0361784
14	413	54	0.0189673
169	687	3	0.00105374
					~
