# Supplementary material for: Excitatory and inhibitory D-serine binding to the NMDA receptor
Source: eLife. 2022 Oct 27;11:e77645. doi: 10.7554/eLife.77645 (PMC9612912; doi:10.7554/eLife.77645)
Supplement: Figure 5—source data 1. [file elife-77645-fig5-data1.xlsx]

## Sheet: 3_Glu
Path ID	Event Type	Ligand ID	Start frame	End Frame	Event duration (ns)	Time bound (ns)	Time apo after (ns)	Median (xi1, xi2)	Dataset	Summary Data		Notes
100	B	LB1	26	46	4.8	10.08		13.4 13.8	10 D-Ser 10 Glu noglyc	62660	frames	Events for which Time apo after is indicated N/A indicate pathways in that temporal overlap with the previous binding event. Also many of the longer binding events are characterized by Glu binding to outer lobe residues and the conserved Arg “flipping out” to form contacts with the Glu carboxyl group
101	U	LB1	87	148	14.64		534	13.0 14.2	10 D-Ser 10 Glu noglyc	15.0384	microseconds
102	B	LB7	2374	2606	55.68	6.96		13.2 14.0	10 D-Ser 10 Glu noglyc
103	U	LB7	2634	2682	11.52		588.96	13.2 15.1	10 D-Ser 10 Glu noglyc
104	B	LB6	5137	5144	1.68	7.44		13.3 13.6	10 D-Ser 10 Glu noglyc
105	U	LB6	5174	5290	27.84		101.04	13.2 13.6	10 D-Ser 10 Glu noglyc
106	B	LB8	5712	5727	3.6	50.4		13.3 14.0	10 D-Ser 10 Glu noglyc
107	U	LB8	5936	6054	28.32		N/A	12.7 14.2	10 D-Ser 10 Glu noglyc
108	B	LB6	5919	6189	64.8	37.2		12.5 14.2	10 D-Ser 10 Glu noglyc
109	U	LB6	6343	6436	22.32		122.16	14.3 16.0	10 D-Ser 10 Glu noglyc
110	B	LB9	6946	6957	2.64	5.76		13.3 14.6	10 D-Ser 10 Glu noglyc
111	U	LB9	6980	6984	0.96		N/A	13.5 15.6	10 D-Ser 10 Glu noglyc
112	B	LB8	6947	7006	14.16	3116.16		13.2 14.5	10 D-Ser 10 Glu noglyc
113	U	LB8	19989	20002	3.12		149.52	15.6 14.1	10 D-Ser 10 Glu noglyc
114	B	LB2	20626	20658	7.68	6.96		13.2 13.8	10 D-Ser 10 Glu noglyc
115	U	LB2	20686	20726	9.6		349.2	14.1 14.4	10 D-Ser 10 Glu noglyc
116	B	LB6	22182	22207	6	34.56		13.1 13.4	10 D-Ser 10 Glu noglyc
117	U	LB6	22350	22359	2.16		141.36	13.8 13.6	10 D-Ser 10 Glu noglyc
118	B	LB9	22949	22970	5.04	988.8		16.8 15.2	10 D-Ser 10 Glu noglyc
119	U	LB9	27089	27118	6.96		54.96	15.7 15.2	10 D-Ser 10 Glu noglyc
120	B	LB5	27348	27363	3.6	2.16		13.0 13.9	10 D-Ser 10 Glu noglyc
121	U	LB5	27371	27377	1.44		230.64	13.4 13.8	10 D-Ser 10 Glu noglyc
122	B	LB2	28339	28636	71.28	54.72		12.1 13.5	10 D-Ser 10 Glu noglyc
123	U	LB2	28863	29712	203.76		1007.52	18.1 13.5	10 D-Ser 10 Glu noglyc
124	B	LB10	33911	33917	1.44	16.56		13.6 13.2	10 D-Ser 10 Glu noglyc
125	U	LB10	33985	34127	34.08		560.16	13.4 13.2	10 D-Ser 10 Glu noglyc
126	B	LB8	36462	36483	5.04	34.32		13.9 13.9	10 D-Ser 10 Glu noglyc
127	U	LB8	36625	36662	8.88		714	14.4 14.6	10 D-Ser 10 Glu noglyc
128	B	LB8	39638	39875	56.88	0.48		14.8 13.2	10 D-Ser 10 Glu noglyc
129	U	LB8	39876	39881	1.2		N/A	15.4 13.1	10 D-Ser 10 Glu noglyc
130	B	LB7	39725	40202	114.48	0.24		15.0 13.2	10 D-Ser 10 Glu noglyc
131	U	LB7	40202	40323	29.04		N/A	15.4 13.8	10 D-Ser 10 Glu noglyc
132	B	LB6	40024	40032	1.92	1082.88		14.6 13.2	10 D-Ser 10 Glu noglyc
133	U	LB6	44543	44569	6.24		155.52	14.4 14.5	10 D-Ser 10 Glu noglyc
134	B	LB1	45218	45262	10.56	1.44		14.5 15.0	10 D-Ser 10 Glu noglyc
135	U	LB1	45267	45302	8.4		832.08	14.0 14.5	10 D-Ser 10 Glu noglyc
136	B	LB8	48770	48778	1.92	6.72		20.6 13.7	10 D-Ser 10 Glu noglyc
137	U	LB8	48805	48810	1.2		4.32	23.2 13.8	10 D-Ser 10 Glu noglyc
138	B	LB4	48829	48837	1.92	0.48		26.0 14.0	10 D-Ser 10 Glu noglyc
139	U	LB4	48838	48854	3.84		828.24	25.3 13.9	10 D-Ser 10 Glu noglyc
140	B	LB3	52306	52360	12.96	0.24		29.4 13.2	10 D-Ser 10 Glu noglyc
141	U	LB3	52360	52426	15.84		260.64	24.1 13.3	10 D-Ser 10 Glu noglyc
142	B	LB3	53513	53518	1.2	1.2		23.4 15.4	10 D-Ser 10 Glu noglyc
143	U	LB3	53522	53528	1.44		391.2	21.6 14.7	10 D-Ser 10 Glu noglyc
144	B	LB5	55159	55175	3.84	356.64		20.7 14.1	10 D-Ser 10 Glu noglyc
145	U	LB5	56660	56824	39.36		857.04	12.0 14.7	10 D-Ser 10 Glu noglyc
146	B	LB10	60396	60418	5.28	0.24		22.6 12.8	10 D-Ser 10 Glu noglyc
147	U	LB10	60418	60424	1.44		79.2	24.3 14.2	10 D-Ser 10 Glu noglyc
148	B	LB5	60755	60805	12	67.44		17.3 14.3	10 D-Ser 10 Glu noglyc
149	U	LB5	61085	61214	30.96		347.04	15.3 14.7	10 D-Ser 10 Glu noglyc
200	B	LB2	4122	4132	2.4	0.72		13.6 14.6	10 D-Ser 10 Glu glyc	62620	frames
201	U	LB2	4134	4142	1.92		2524.8	12.9 13.7	10 D-Ser 10 Glu glyc	15.0288	microseconds
202	B	LB8	14663	14682	4.56	47.52		13.1 13.8	10 D-Ser 10 Glu glyc
203	U	LB8	14879	14964	20.4		999.36	12.2 14.3	10 D-Ser 10 Glu glyc
204	B	LB2	19129	19135	1.44	6.72		24.8 13.8	10 D-Ser 10 Glu glyc
205	U	LB2	19162	19162	0		1272.48	27.5 13.9	10 D-Ser 10 Glu glyc
206	B	LB2	24465	24646	43.44	13.68		18.9 13.7	10 D-Ser 10 Glu glyc
207	U	LB2	24702	24733	7.44		1436.16	17.5 13.6	10 D-Ser 10 Glu glyc
208	B	LB8	30718	30728	2.4	0.24		24.7 18.1	10 D-Ser 10 Glu glyc
209	U	LB8	30728	30733	1.2		24.96	26.6 17.8	10 D-Ser 10 Glu glyc
210	B	LB6	30838	30847	2.16	269.76		28.3 17.0	10 D-Ser 10 Glu glyc
211	U	LB6	31970	31993	5.52		1031.04	19.1 15.7	10 D-Ser 10 Glu glyc
212	B	LB4	36290	36298	1.92	21.12		16.9 13.8	10 D-Ser 10 Glu glyc
213	U	LB4	36385	36412	6.48		24.96	18.1 14.4	10 D-Ser 10 Glu glyc
214	B	LB2	36517	36519	0.48	28.8		21.7 16.0	10 D-Ser 10 Glu glyc
215	U	LB2	36638	36708	16.8		425.04	20.4 15.4	10 D-Ser 10 Glu glyc
216	B	LB9	38480	38559	18.96	138		18.1 13.6	10 D-Ser 10 Glu glyc
217	U	LB9	39133	39147	3.36		848.4	21.0 14.7	10 D-Ser 10 Glu glyc
218	B	LB2	42683	42704	5.04	20.88		12.5 13.3	10 D-Ser 10 Glu glyc
219	U	LB2	42790	42883	22.32		162.72	13.4 13.6	10 D-Ser 10 Glu glyc
220	B	LB3	43562	43565	0.72	140.88		14.5 13.3	10 D-Ser 10 Glu glyc
221	U	LB3	44151	44216	15.6		533.28	12.4 14.1	10 D-Ser 10 Glu glyc
222	B	LB5	46439	46538	23.76	177.12		18.2 14.0	10 D-Ser 10 Glu glyc
223	U	LB5	47275	47285	2.4		755.28	15.3 13.4	10 D-Ser 10 Glu glyc
224	B	LB9	50433	50446	3.12	0.48		12.4 13.2	10 D-Ser 10 Glu glyc
225	U	LB9	50447	50453	1.44		47.04	12.4 12.9	10 D-Ser 10 Glu glyc
226	B	LB4	50650	50653	0.72	119.28		17.7 13.4	10 D-Ser 10 Glu glyc
227	U	LB4	51149	51172	5.52		74.88	19.8 13.3	10 D-Ser 10 Glu glyc
228	B	LB1	51485	51511	6.24	153.12		14.3 11.8	10 D-Ser 10 Glu glyc
229	U	LB1	52148	52181	7.92		178.08	28.5 12.9	10 D-Ser 10 Glu glyc
230	B	LB5	52924	52951	6.48	1065.36		24.2 13.2	10 D-Ser 10 Glu glyc
231	U	LB5	57389	57422	7.92		194.16	14.1 13.9	10 D-Ser 10 Glu glyc
232	B	LB1	58232	58234	0.48	22.08		12.2 14.5	10 D-Ser 10 Glu glyc
233	U	LB1	58325	58335	2.4		1028.4	13.2 14.0	10 D-Ser 10 Glu glyc
			Glyc		Non-glyc	VOL
		Total Time	15028.8		15038.4	1.694e-21
		Time not free	2478.72		6875.04
		Time free	12550.1		8163.36
		denominator	1.23022e-07		8.00213e-08
	all	numerator (Nb)	17		25
	>100 ns	numerator (Nb)	6
		k_on	1.38186e+08	all	3.12417e+08
			4.87717e+07	>100 ns
		Kd	1.60116e+06		375500
		dG_bind	-8.79502		-7.90222
