# Supplementary material for: Excitatory and inhibitory D-serine binding to the NMDA receptor
Source: eLife. 2022 Oct 27;11:e77645. doi: 10.7554/eLife.77645 (PMC9612912; doi:10.7554/eLife.77645)
Supplement: Figure 5—source data 2. [file elife-77645-fig5-data2.xlsx]

## Sheet: 7_Dser_vs_Glu
resid (model)	resid (Uniprot)	% path frames D-Ser	% path frames Glu	Difference
14	413	0.546914	0.0440457	0.502868	D-Ser
212	730	0.449383	0.0195759	0.429807	D-Ser
88	487	0.217284	0.603589	0.386305	Glu
112	511	0.388889	0.0244698	0.364419	D-Ser
213	731	0.338272	0.0309951	0.307276	D-Ser
95	494	0.377778	0.146819	0.230959	D-Ser
171	689	0.376543	0.177814	0.198729	D-Ser
169	687	0.418519	0.231648	0.186871	D-Ser
94	493	0.22963	0.0668842	0.162745	D-Ser
243	761	0.181481	0.0195759	0.161906	D-Ser
114	513	0.390123	0.231648	0.158476	D-Ser
173	691	0.359259	0.212072	0.147187	D-Ser
86	485	0.437037	0.292007	0.145031	D-Ser
117	516	0.145679	0.0277325	0.117947	D-Ser
116	515	0.62716	0.743883	0.116722	Glu
85	484	0.211111	0.128874	0.0822367	D-Ser
177	695	0.307407	0.384992	0.0775844	Glu
42	441	0.00617284	0.0799347	0.0737619	Glu
82	481	0.0135802	0.08646	0.0728798	Glu
89	488	0.219753	0.285481	0.0657282	Glu
196	714	0.0765432	0.0146819	0.0618613	D-Ser
172	690	0.0765432	0.0228385	0.0537047	D-Ser
220	738	0.0641975	0.0114192	0.0527783	D-Ser
91	490	0.11358	0.0619902	0.05159	D-Ser
118	517	0.877778	0.926591	0.0488128	Glu
175	693	0.0345679	0.0815661	0.0469982	Glu
83	482	0.0851852	0.132137	0.0469518	Glu
13	412	0.0950617	0.0489396	0.0461221	D-Ser
121	520	0.0567901	0.0195759	0.0372143	D-Ser
100	499	0.00123457	0.0342577	0.0330232	Glu
178	696	0.0666667	0.0946166	0.02795	Glu
47	446	0.00246914	0.0261011	0.023632	Glu
22	421	0.00123457	0.0228385	0.0216039	Glu
55	454	0.00123457	0.0228385	0.0216039	Glu
174	692	0.648148	0.628059	0.0200894	D-Ser
39	438	0.0419753	0.0619902	0.0200149	Glu
188	706	0.00617284	0.0261011	0.0199283	Glu
97	496	0.0209877	0.00163132	0.0193563	D-Ser
132	531	0.0283951	0.0114192	0.0169758	D-Ser
45	444	0.00123457	0.0179445	0.01671	Glu
189	707	0.00617284	0.0195759	0.013403	Glu
105	504	0.00617284	0.0163132	0.0101404	Glu
191	709	0.0148148	0.00489396	0.00992085	D-Ser
241	759	0.00617284	0.0146819	0.00850905	Glu
192	710	0.0197531	0.0114192	0.00833384	D-Ser
193	711	0.00864198	0.00163132	0.00701065	D-Ser
92	491	0.139506	0.145188	0.00568143	Glu
103	502	0.00740741	0.00326264	0.00414476	D-Ser
184	702	0.0432099	0.0473083	0.00409844	Glu
185	703	0.0135802	0.00978793	0.00379232	D-Ser
179	697	0.00493827	0.00815661	0.00321834	Glu
44	443	0.00123457	0.00163132	0.000396753	Glu
119	518	1	1	0	Glu
