# Supplementary material for: Excitatory and inhibitory D-serine binding to the NMDA receptor
Source: eLife. 2022 Oct 27;11:e77645. doi: 10.7554/eLife.77645 (PMC9612912; doi:10.7554/eLife.77645)
Supplement: Figure 6—source data 1. [file elife-77645-fig6-data1.xlsx]

## Sheet: 11_glyc_vs_noglyc
GluN2A							GluN1
resid (model)	resid (Uniprot)	% path frames D-Ser	% path frames Glu	Difference			resid (model)	resid (Uniprot)	% path frames D-Ser	% path frames Glu	Difference
14	413	0.546914	1	0.453086	noglyc		97	489	0.670823	0.179577	0.491245	glyc
112	511	0.388889	0.822222	0.433333	noglyc		96	488	0.0773067	0.411972	0.334665	noglyc
86	485	0.437037	0.855556	0.418519	noglyc		103	495	0.296758	0.0211268	0.275631	glyc
213	731	0.338272	0.75	0.411728	noglyc		106	498	0.269327	0.00704225	0.262284	glyc
212	730	0.449383	0.855556	0.406173	noglyc		130	522	0.488778	0.746479	0.257701	noglyc
116	515	0.62716	0.233333	0.393827	glyc		104	496	0.316708	0.130282	0.186427	glyc
118	517	0.877778	0.627778	0.25	glyc		105	497	0.44389	0.264085	0.179806	glyc
117	516	0.145679	0.394444	0.248765	noglyc		128	520	0.117207	0.28169	0.164483	noglyc
121	520	0.0567901	0.261111	0.204321	noglyc		187	695	0.21197	0.0492958	0.162674	glyc
172	690	0.0765432	0.205556	0.129012	noglyc		107	499	0.0448878	0.193662	0.148774	noglyc
173	691	0.359259	0.233333	0.125926	glyc		91	483	0.184539	0.0387324	0.145806	glyc
193	711	0.00864198	0.122222	0.11358	noglyc		224	732	0.144638	0.00352113	0.141117	glyc
119	518	1	0.888889	0.111111	glyc		134	526	0.0972569	0.225352	0.128095	noglyc
85	484	0.211111	0.322222	0.111111	noglyc		126	518	0.139651	0.028169	0.111482	glyc
88	487	0.217284	0.116667	0.100617	glyc		179	687	0.114713	0.00352113	0.111192	glyc
95	494	0.377778	0.277778	0.1	glyc		133	525	0.246883	0.140845	0.106038	glyc
171	689	0.376543	0.472222	0.095679	noglyc		89	481	0.154613	0.056338	0.0982754	glyc
94	493	0.22963	0.144444	0.0851852	glyc		180	688	0.199501	0.112676	0.0868252	glyc
243	761	0.181481	0.266667	0.0851852	noglyc		13	405	0.0922693	0.0140845	0.0781848	glyc
91	490	0.11358	0.0388889	0.0746914	glyc		95	487	0.0698254	0.147887	0.0780619	noglyc
197	715	0.0111111	0.0833333	0.0722222	noglyc		99	491	0.0074813	0.0809859	0.0735046	noglyc
174	692	0.648148	0.583333	0.0648148	glyc		186	694	0.074813	0.130282	0.0554687	noglyc
92	491	0.139506	0.0777778	0.0617284	glyc		182	690	0.0124688	0.0598592	0.0473903	noglyc
13	412	0.0950617	0.0388889	0.0561728	glyc		214	722	0.0523691	0.00704225	0.0453268	glyc
89	488	0.219753	0.166667	0.0530864	glyc		205	713	0.042394	0.00352113	0.0388729	glyc
45	444	0.00123457	0.05	0.0487654	noglyc		129	521	0.00997506	0.0457746	0.0357996	noglyc
177	695	0.307407	0.355556	0.0481481	noglyc		199	707	0.0199501	0.0528169	0.0328668	noglyc
44	443	0.00123457	0.0444444	0.0432099	noglyc		248	756	0.0349127	0.00352113	0.0313916	glyc
220	738	0.0641975	0.0222222	0.0419753	glyc		49	441	0.0074813	0.0387324	0.0312511	noglyc
114	513	0.390123	0.35	0.0401235	glyc		208	716	0.0399002	0.0105634	0.0293369	glyc
178	696	0.0666667	0.105556	0.0388889	noglyc		215	723	0.032419	0.00352113	0.0288978	glyc
42	441	0.00617284	0.0444444	0.0382716	noglyc		235	743	0.042394	0.0140845	0.0283095	glyc
196	714	0.0765432	0.0388889	0.0376543	glyc		196	704	0.0274314	0.0528169	0.0253855	noglyc
39	438	0.0419753	0.00555556	0.0364198	glyc		101	493	0.0249377	0.00352113	0.0214165	glyc
184	702	0.0432099	0.0111111	0.0320988	glyc		195	703	0.0174564	0.0387324	0.021276	noglyc
83	482	0.0851852	0.116667	0.0314815	noglyc		100	492	0.0523691	0.0316901	0.0206789	glyc
191	709	0.0148148	0.0444444	0.0296296	noglyc		234	742	0.0224439	0.00352113	0.0189228	glyc
169	687	0.418519	0.394444	0.0240741	glyc		51	443	0.00249377	0.0211268	0.018633	noglyc
21	420	0.00123457	0.0166667	0.0154321	noglyc		204	712	0.032419	0.0140845	0.0183344	glyc
219	737	0.00123457	0.0166667	0.0154321	noglyc		94	486	0.124688	0.109155	0.0155333	glyc
82	481	0.0135802	0.0277778	0.0141975	noglyc		177	685	0.0224439	0.00704225	0.0154016	glyc
132	531	0.0283951	0.0166667	0.0117284	glyc		178	686	0.0822943	0.0950704	0.0127762	noglyc
189	707	0.00617284	0.0166667	0.0104938	noglyc		14	406	0.0124688	0.0246479	0.0121791	noglyc
105	504	0.00617284	0.0166667	0.0104938	noglyc		231	739	0.0224439	0.0105634	0.0118805	glyc
103	502	0.00740741	0.0166667	0.00925926	noglyc		256	764	0.00249377	0.0140845	0.0115907	noglyc
97	496	0.0209877	0.0166667	0.00432099	glyc		54	446	0.00249377	0.0105634	0.00806961	noglyc
100	499	0.00123457	0.00555556	0.00432099	noglyc		20	412	0.0074813	0.0140845	0.00660321	noglyc
49	448	0.00987654	0.00555556	0.00432099	glyc		255	763	0.0249377	0.0211268	0.0038109	glyc
188	706	0.00617284	0.00555556	0.000617284	glyc		50	442	0.0124688	0.0140845	0.00161568	noglyc
							201	709	0.00249377	0.00352113	0.00102736	noglyc
							203	711	0.00249377	0.00352113	0.00102736	noglyc
							200	708	0.0074813	0.00704225	0.000439043	glyc
							257	765	0.0249377	0.0246479	0.000289769	glyc
							12	404	0.0174564	0.0176056	0.000149275	noglyc
							102	494	0.042394	0.0422535	0.000140494	glyc
							131	523	1	1	0	noglyc
